# Supplementary material for: Nomogram Personalizes and Visualizes the Overall Survival of Patients with Triple‐Negative Breast Cancer Based on the Immune Genome
Source: Hindawi journal article supplement (doi:10.1155/2020/4029062), 2020-01-01

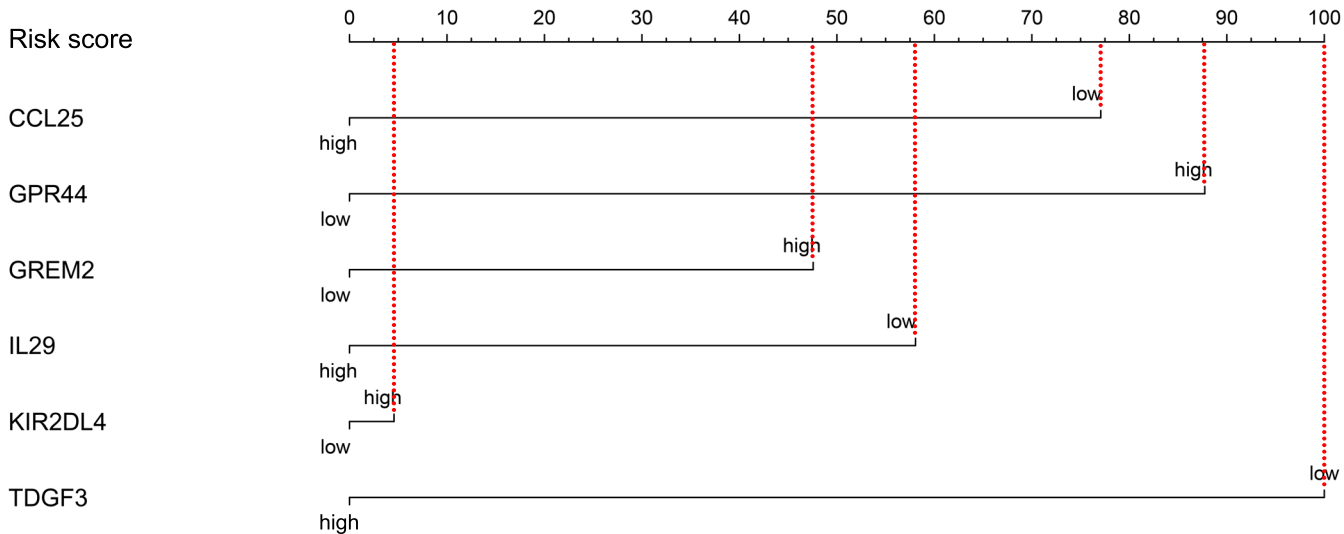

Total risk scores

1-year Survival Probability

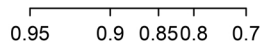

2-year Survival Probability

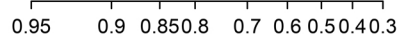

3-year Survival Probability

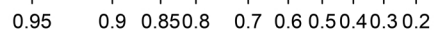

4-year Survival Probability

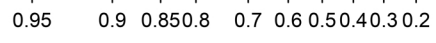

5-year Survival Probability

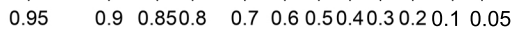

Supplement: f1 [file 4029062.f1.pdf]
