# Supplementary material for: Nomogram Personalizes and Visualizes the Overall Survival of Patients with Triple‐Negative Breast Cancer Based on the Immune Genome
Source: Hindawi journal article supplement (doi:10.1155/2020/4029062), 2020-01-01

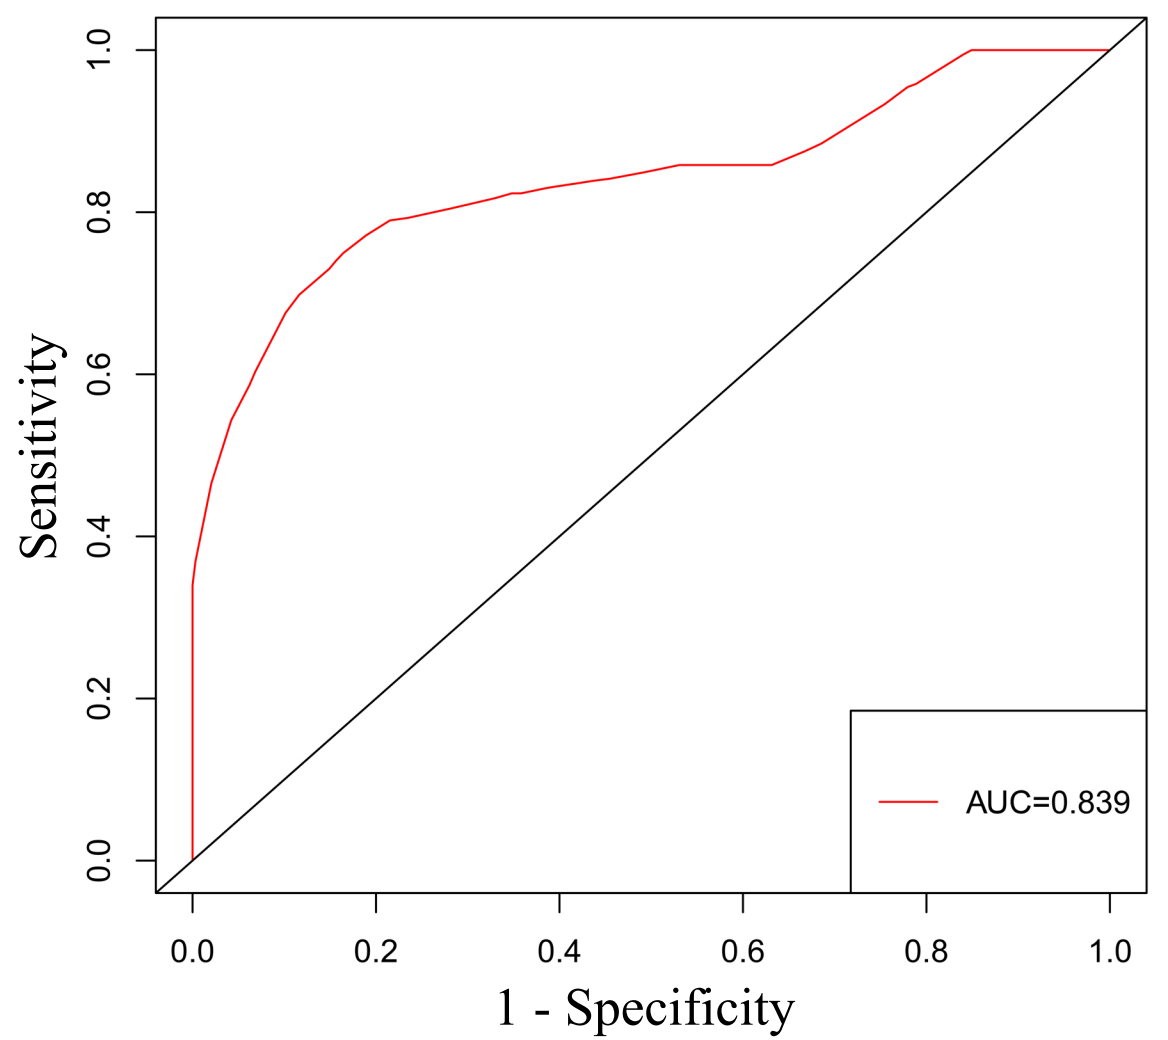

Supplement: f2 [file 4029062.f2.pdf]
